# Supplementary material
Source: PubMed Central journal article supplement (PMC2453738)
Supplement: 0710060105_0710060105SI.pdf [file 0710060105_0710060105SI.pdf]

# Supporting Information

Goldin-Meadow *et al.* 10.1073/pnas.0710060105

Table S1. List of vignettes used in the gesture and transparency tasks

| Action                                     | Type of object |         |          | Toys or real objects/people |
|--------------------------------------------|----------------|---------|----------|-----------------------------|
|                                            | Actor          | Patient | Endpoint |                             |
| <b>Intransitive actions in place</b>       |                |         |          |                             |
| Girl topples over                          | Human          |         |          | Toy                         |
| Man bends over                             | Human          |         |          | Toy                         |
| Girl waves                                 | Human          |         |          | Toy                         |
| Chicken moves in circle                    | Animal         |         |          | Toy                         |
| Bicycle bends                              | Vehicle        |         |          | Toy                         |
| Ball bounces                               | Object         |         |          | Toy                         |
| Fence closes                               | Object         |         |          | Toy                         |
| <b>Intransitive actions crossing space</b> |                |         |          |                             |
| Man crawls to cat                          | Human          |         | Animal   | Real                        |
| Dog moves to van                           | Animal         |         | Vehicle  | Real                        |
| Van drives to man                          | Vehicle        |         | Human    | Real                        |
| Boy moves to girl                          | Human          |         | Human    | Real                        |
| Girl moves to van                          | Human          |         | Vehicle  | Real                        |
| Chicken moves to captain                   | Animal         |         | Human    | Toy                         |
| Man moves to motorcycle                    | Human          |         | Vehicle  | Toy                         |
| Baby moves to chicken                      | Human          |         | Animal   | Toy                         |
| Duck moves to wheelbarrow                  | Animal         |         | Object   | Toy                         |
| Train moves into fenced area               | Vehicle        |         | Object   | Toy                         |
| Bus moves to girl                          | Vehicle        |         | Human    | Toy                         |
| Basket moves to washer woman               | Object         |         | Human    | Toy                         |
| Tool box moves to school bus               | Object         |         | Vehicle  | Toy                         |
| <b>Transitive actions in place</b>         |                |         |          |                             |
| Boy stirs spoon                            | Human          | Object  |          | Real                        |
| Boy tilts glass                            | Human          | Object  |          | Real                        |
| Woman twists knob                          | Human          | Object  |          | Real                        |
| Girl covers box                            | Human          | Object  |          | Real                        |
| Captain swings pail                        | Human          | Object  |          | Toy                         |
| Man picks up baby                          | Human          | Human   |          | Toy                         |
| Washer woman pets dog                      | Human          | Animal  |          | Toy                         |
| Man plays guitar                           | Human          | Object  |          | Toy                         |
| <b>Transitive actions crossing space</b>   |                |         |          |                             |
| Man moves garbage can to motorcycle man    | Human          | Object  | Human    | Toy                         |
| Man carries chicken to scaffolding         | Human          | Animal  | Object   | Toy                         |
| Man gives tool box to captain              | Human          | Object  | Human    | Toy                         |
| Girl gives flower to man                   | Human          | Object  | Human    | Toy                         |
| Man throws ball to basket                  | Human          | Object  | Object   | Toy                         |
| Dog carries flower to doghouse             | Animal         | Object  | Object   | Toy                         |
| Workman pushes wheelbarrow to train        | Human          | Object  | Vehicle  | Toy                         |
| Bike with cart carries girl to giraffe     | Vehicle        | Human   | Animal   | Toy                         |
